# Supplementary material for: Clinical, pathological, and PAM50 gene expression features of HER2-low breast cancer
Source: PubMed Central journal article supplement (PMC7782714; doi:10.1038/s41523-020-00208-2), 2021-01-04
Supplement: 41523_2020_208_MOESM1_ESM.pdf [file 41523_2020_208_MOESM1_ESM.pdf]

## Supplementary tables

### Supplementary table 1. Demographics according to HER2 IHC status

| DEMOGRAPHICS                    | HER2-NEGATIVE |      |         |      |                       |      |                    |      | p*           |
|---------------------------------|---------------|------|---------|------|-----------------------|------|--------------------|------|--------------|
|                                 | HER2 0        |      | HER2 1+ |      | HER2 2+ NON-AMPLIFIED |      | OVERALL POPULATION |      |              |
|                                 | N             | %    | N       | %    | N                     | %    | N                  | %    |              |
|                                 | 1486          | 40.3 | 1489    | 40.4 | 714                   | 19.3 | 3689               | 100  |              |
| <b>Age at diagnosis (years)</b> |               |      |         |      |                       |      |                    |      |              |
| Median                          | 55            |      | 58      |      | 60                    |      | 58                 |      | <b>0.005</b> |
| IQR                             | 46 - 65       |      | 48 - 67 |      | 49 - 68               |      | 48 - 67            |      |              |
| Min - max                       | 24 - 93       |      | 26 - 96 |      | 26 - 90               |      | 24 - 96            |      |              |
| Pts with available data         | 259           | 27.4 | 427     | 45.2 | 258                   | 27.3 | 944                | 100  |              |
| <b>Sex</b>                      |               |      |         |      |                       |      |                    |      |              |
| Male                            | 0             | 0    | 13      | 0.9  | 2                     | 0.3  | 15                 | 0.4  | <b>0.001</b> |
| Female                          | 1486          | 100  | 1475    | 99.1 | 712                   | 99.7 | 3673               | 99.6 |              |
| Total                           | 1486          | 40.3 | 1488    | 40.4 | 714                   | 19.3 | 3688               | 100  |              |
| <b>Menopausal status</b>        |               |      |         |      |                       |      |                    |      |              |
| Pre/perimenopausal              | 385           | 37.3 | 454     | 37.4 | 206                   | 36.4 | 1045               | 37.2 | 0.908        |
| Postmenopausal                  | 646           | 62.7 | 759     | 62.6 | 360                   | 63.6 | 1765               | 62.8 |              |
| Total                           | 1031          | 36.7 | 1213    | 43.2 | 566                   | 20.1 | 2810               | 100  |              |
| <b>Biospecimen</b>              |               |      |         |      |                       |      |                    |      |              |
| Primary lesion                  | 1000          | 73.7 | 959     | 79.1 | 423                   | 74.7 | 2382               | 72.1 | 0.143        |
| Other lesion                    | 357           | 34.6 | 377     | 28.7 | 186                   | 32.9 | 920                | 27.9 |              |
| Total                           | 1357          | 41.1 | 1336    | 40.5 | 609                   | 18.4 | 3302               | 100  |              |
| <b>Histotype</b>                |               |      |         |      |                       |      |                    |      |              |
| Ductal                          | 639           | 70.8 | 799     | 73   | 415                   | 76.9 | 1853               | 73   | 0.18         |
| Lobular                         | 194           | 21.5 | 221     | 20.2 | 93                    | 17.2 | 508                | 20   |              |
| Other                           | 69            | 7.6  | 75      | 6.8  | 32                    | 5.9  | 176                | 6.9  |              |
| Total                           | 902           | 35.6 | 1095    | 43.2 | 540                   | 21.3 | 2537               | 100  |              |
| <b>T</b>                        |               |      |         |      |                       |      |                    |      |              |
| 1                               | 509           | 55.8 | 573     | 50.7 | 234                   | 44.5 | 1316               | 51.2 | <b>0.005</b> |
| 2                               | 294           | 32.2 | 409     | 36.2 | 209                   | 39.7 | 912                | 35.5 |              |
| 3                               | 71            | 7.8  | 93      | 8.2  | 49                    | 9.3  | 213                | 8.3  |              |
| 4                               | 38            | 4.2  | 55      | 4.9  | 34                    | 6.5  | 127                | 4.9  |              |
| Total                           | 912           | 35.5 | 1130    | 44   | 526                   | 20.5 | 2568               | 100  |              |
| <b>N</b>                        |               |      |         |      |                       |      |                    |      |              |
| 0                               | 556           | 58.8 | 662     | 57.3 | 275                   | 52   | 1493               | 56.8 | <b>0.009</b> |
| 1                               | 272           | 28.8 | 300     | 26   | 164                   | 31   | 736                | 28   |              |
| 2                               | 71            | 7.5  | 104     | 9    | 44                    | 8.3  | 219                | 8.3  |              |
| 3                               | 46            | 4.9  | 89      | 7.7  | 46                    | 8.7  | 181                | 6.9  |              |
| Total                           | 945           | 35.9 | 1155    | 43.9 | 529                   | 20.1 | 2629               | 100  |              |
| <b>Metastatic status</b>        |               |      |         |      |                       |      |                    |      |              |

|                                |          |      |          |      |          |      |          |      |        |
|--------------------------------|----------|------|----------|------|----------|------|----------|------|--------|
| Metastatic Yes                 | 529      | 65.6 | 601      | 61.3 | 280      | 64.1 | 1410     | 63.4 | 0.173  |
| Metastatic No                  | 278      | 34.4 | 379      | 38.7 | 157      | 35.9 | 814      | 36.6 |        |
| Total                          | 807      | 36.3 | 980      | 44.1 | 437      | 19.6 | 2224     | 100  |        |
| Ab initio Yes                  | 136      | 10   | 151      | 11.4 | 80       | 13.4 | 367      | 11.2 | 0.087  |
| Ab initio No                   | 1218     | 90   | 1172     | 88.6 | 515      | 86.6 | 2905     | 88.8 |        |
| Total                          | 1354     | 41.4 | 1323     | 40.4 | 595      | 18.2 | 3272     | 100  |        |
| <b>ER</b>                      |          |      |          |      |          |      |          |      |        |
| Positive                       | 983      | 67   | 1261     | 85.9 | 633      | 89.7 | 2877     | 79   | <0.001 |
| Negative                       | 484      | 33   | 207      | 14.1 | 73       | 10.3 | 764      | 21   |        |
| Total                          | 1467     | 40.3 | 1468     | 40.4 | 706      | 19.3 | 3641     | 100  |        |
| <b>PgR</b>                     |          |      |          |      |          |      |          |      |        |
| Positive                       | 789      | 54.7 | 1030     | 70.9 | 512      | 73.7 | 2331     | 64.9 | <0.001 |
| Negative                       | 654      | 45.3 | 423      | 29.1 | 183      | 26.3 | 1260     | 35.1 |        |
| Total                          | 1443     | 40.2 | 1453     | 40.5 | 695      | 19.3 | 3591     | 100  |        |
| <b>G</b>                       |          |      |          |      |          |      |          |      |        |
| 1                              | 67       | 8.8  | 107      | 11.6 | 32       | 8.1  | 206      | 9.9  | 0.041  |
| 2                              | 272      | 35.6 | 353      | 38.4 | 161      | 40.9 | 786      | 37.8 |        |
| 3                              | 426      | 55.7 | 459      | 49.9 | 201      | 51   | 1086     | 52.3 |        |
| Total                          | 765      | 36.8 | 919      | 44.2 | 394      | 19   | 2078     | 100  |        |
| <b>Ki67</b>                    |          |      |          |      |          |      |          |      |        |
| Median                         | 16       |      | 18       |      | 18       |      | 18       |      | 0.811  |
| IQR                            | 9 - 30   |      | 10 - 26  |      | 10 - 27  |      | 10 - 27  |      |        |
| Min - max                      | 0.5 - 95 |      | 0.5 - 95 |      | 0.5 - 93 |      | 0.5 - 95 |      |        |
| Pts with available data        | 433      | 36.4 | 483      | 40.6 | 273      | 23   | 1189     | 100  |        |
| ≤14%                           | 190      | 43.9 | 193      | 40   | 101      | 37   | 484      | 40.7 | 0.176  |
| >14%                           | 243      | 56.1 | 290      | 60   | 172      | 63   | 705      | 59.3 |        |
| <20%                           | 236      | 54.5 | 268      | 55.5 | 143      | 52.4 | 647      | 54.4 | 0.712  |
| ≥20%                           | 197      | 45.5 | 215      | 44.5 | 130      | 47.6 | 542      | 45.6 |        |
| <b>TILs</b>                    |          |      |          |      |          |      |          |      |        |
| Median                         | 1        |      | 1        |      | 5        |      | 1        |      | 0.033  |
| IQR                            | 0 - 5    |      | 1 - 5    |      | 1 - 5    |      | 1 - 5    |      |        |
| Min - max                      | 0 - 80   |      | 0 - 80   |      | 0 - 60   |      | 0 - 80   |      |        |
| Pts with available data        | 102      | 37.2 | 108      | 39.4 | 64       | 23.4 | 274      | 100  |        |
| <b>PAM50 subtypes</b>          |          |      |          |      |          |      |          |      |        |
| Luminal A                      | 193      | 28.7 | 283      | 49   | 176      | 54.2 | 652      | 41.4 | <0.001 |
| Luminal B                      | 127      | 18.9 | 162      | 28   | 98       | 30.2 | 387      | 24.6 |        |
| HER2-enriched                  | 40       | 5.9  | 23       | 4    | 9        | 2.8  | 72       | 4.6  |        |
| Basal-like                     | 294      | 43.7 | 88       | 15.2 | 32       | 9.8  | 414      | 26.3 |        |
| Normal-like                    | 19       | 2.8  | 22       | 3.8  | 10       | 3.1  | 51       | 3.2  |        |
| Total                          | 673      | 42.7 | 578      | 36.7 | 325      | 20.6 | 1576     | 100  |        |
| <b>IHC subtypes simplified</b> |          |      |          |      |          |      |          |      |        |
| HR-positive                    | 1025     | 69.6 | 1296     | 87.3 | 641      | 90.3 | 2962     | 80.8 | <0.001 |
| Triple Negative                | 448      | 30.4 | 189      | 12.7 | 69       | 9.7  | 706      | 19.2 |        |

|       |      |      |      |      |     |      |      |     |
|-------|------|------|------|------|-----|------|------|-----|
| Total | 1473 | 40.3 | 1485 | 40.4 | 710 | 19.3 | 3668 | 100 |
|-------|------|------|------|------|-----|------|------|-----|

**Legend and footnotes.** Pts: patients; HR: hormone receptors; IQR: interquartile range; IHC: immunohistochemical; TILs: tumor-infiltrating lymphocytes; \*: Chi square test for differences in proportions, Kruskalis-Wallis and Wilcoxon rank sum test with continuity correction, where appropriate, for continuous variables (median comparisons)

**Supplementary table 2. Demographics according to HR status.**

| PATIENTS' AND TUMORS' CHARACTERISTICS | HER2-NEGATIVE |      |                 |      |         |       | P*               |
|---------------------------------------|---------------|------|-----------------|------|---------|-------|------------------|
|                                       | HR-POSITIVE   |      | TRIPLE NEGATIVE |      | OVERALL |       |                  |
|                                       | N             | %    | N               | %    | N       | %     |                  |
|                                       | 2962          | 80.3 | 706             | 19.1 | 3689    | 100.0 |                  |
| <b>Age at diagnosis</b>               |               |      |                 |      |         |       |                  |
| Median                                | 58.0          |      | 51.0            |      | 58      |       | <b>0.001</b>     |
| IQR                                   | 48.0 - 67.0   |      | 45.0 - 62.0     |      | 48 - 67 |       |                  |
| <b>Sex</b>                            |               |      |                 |      |         |       |                  |
| Male                                  | 14            | 0.5  | 1               | 0.1  | 15      | 0.4   | 0.215            |
| Female                                | 2947          | 99.5 | 705             | 99.9 | 3652    | 99.6  |                  |
| Missing                               | 2961          | 80.7 | 706             | 19.3 | 3667    | 100.0 |                  |
| <b>Menopausal status</b>              |               |      |                 |      |         |       |                  |
| Pre/perimenopausal                    | 895           | 35.9 | 148             | 47.7 | 1043    | 37.2  | <b>&lt;0.001</b> |
| Postmenopausal                        | 1596          | 64.1 | 162             | 52.3 | 1758    | 62.8  |                  |
| Missing                               | 2491          | 88.9 | 310             | 11.1 | 2801    | 100.0 |                  |
| <b>TILs</b>                           |               |      |                 |      |         |       |                  |
| median                                | 1             |      | 5               |      | -       |       | 0.296            |
| IQR                                   | 1 - 5         |      | 1 - 40          |      | -       |       |                  |
| Pts with available data               | 269           |      | 5               |      | 274     |       |                  |
| <b>Histotype</b>                      |               |      |                 |      |         |       |                  |
| Ductal                                | 1563          | 70.8 | 279             | 87.7 | 1842    | 73.0  | <b>&lt;0.001</b> |
| Lobular                               | 487           | 22.1 | 21              | 6.6  | 508     | 20.1  |                  |
| Other                                 | 157           | 7.1  | 18              | 5.7  | 175     | 6.9   |                  |
| Total                                 | 2207          | 87.4 | 318             | 12.6 | 2525    | 100.0 |                  |
| <b>T</b>                              |               |      |                 |      |         |       |                  |
| 1                                     | 1194          | 53.0 | 120             | 39.0 | 1314    | 51.3  | <b>&lt;0.001</b> |
| 2                                     | 776           | 34.5 | 133             | 43.2 | 909     | 35.5  |                  |
| 3                                     | 184           | 8.2  | 27              | 8.8  | 211     | 8.2   |                  |
| 4                                     | 98            | 4.4  | 28              | 9.1  | 126     | 4.9   |                  |
| Total                                 | 2252          | 88.0 | 308             | 12.0 | 2560    | 100.0 |                  |
| <b>N</b>                              |               |      |                 |      |         |       |                  |
| 0                                     | 1332          | 57.6 | 157             | 51.1 | 1489    | 56.8  | <b>0.036</b>     |
| 1                                     | 646           | 27.9 | 87              | 28.3 | 733     | 28.0  |                  |
| 2                                     | 183           | 7.9  | 34              | 11.1 | 217     | 8.3   |                  |
| 3                                     | 152           | 6.6  | 29              | 9.4  | 181     | 6.9   |                  |
| Total                                 | 2313          | 88.3 | 307             | 11.7 | 2620    | 100.0 |                  |
| <b>Metastatic ab initio</b>           |               |      |                 |      |         |       |                  |
| Yes                                   | 330           | 12.8 | 36              | 5.3  | 366     | 11.2  | <b>&lt;0.001</b> |
| No                                    | 2248          | 87.2 | 649             | 94.7 | 2897    | 88.8  |                  |

|                       |      |      |     |      |      |       |                  |
|-----------------------|------|------|-----|------|------|-------|------------------|
| Missing               | 2578 | 79.0 | 685 | 21.0 | 3263 | 100.0 |                  |
| <b>G</b>              |      |      |     |      |      |       |                  |
| 1                     | 200  | 11.0 | 6   | 2.4  | 206  | 10.0  | <b>&lt;0.001</b> |
| 2                     | 763  | 42.0 | 21  | 8.3  | 784  | 37.9  |                  |
| 3                     | 852  | 46.9 | 225 | 89.3 | 1077 | 52.1  |                  |
| Total                 | 1815 | 87.8 | 252 | 12.2 | 2067 | 100.0 |                  |
| <b>Ki67</b>           |      |      |     |      |      |       |                  |
| ≤14%                  | 477  | 20.7 | 4   | 7.4  | 481  | 20.4  | <b>0.01</b>      |
| >14%                  | 676  | 29.3 | 23  | 42.6 | 699  | 29.6  |                  |
| <20%                  | 637  | 27.6 | 6   | 11.1 | 643  | 27.2  | <b>0.001</b>     |
| ≥20%                  | 516  | 22.4 | 21  | 38.9 | 537  | 22.8  |                  |
| Missing               | 2306 | 97.7 | 54  | 2.3  | 2360 | 100.0 |                  |
| <b>HER2 status</b>    |      |      |     |      |      |       |                  |
| IHC 0                 | 1025 | 34.6 | 448 | 63.4 | 1473 | 40.2  | <b>&lt;0.001</b> |
| IHC 1+                | 1296 | 43.8 | 189 | 26.8 | 1485 | 40.5  |                  |
| IHC 2+ Not Amplified  | 641  | 21.6 | 69  | 9.8  | 710  | 19.4  |                  |
| Total                 | 2962 | 80.8 | 706 | 19.2 | 3668 | 100.0 |                  |
| <b>PAM50 subtypes</b> |      |      |     |      |      |       |                  |
| Luminal A             | 644  | 56.6 | 7   | 1.6  | 651  | 41.4  | <b>&lt;0.001</b> |
| Luminal B             | 385  | 33.9 | 1   | 0.2  | 386  | 24.5  |                  |
| HER2-enriched         | 35   | 3.1  | 37  | 8.5  | 72   | 4.6   |                  |
| Basal-like            | 44   | 3.9  | 370 | 84.7 | 414  | 26.3  |                  |
| Normal-like           | 29   | 2.5  | 22  | 5.0  | 51   | 3.2   |                  |
| Total                 | 1137 | 72.2 | 437 | 27.8 | 1574 | 100.0 |                  |

**Legend and footnotes.** \*: Chi square test for differences in proportions, Kruskalis-Wallis and Wilcoxon rank sum test with continuity correction, where appropriate, for continuous variables (median comparisons)

**Supplementary Table 3. PAM50 intrinsic subtypes distribution within HR-positive and TN tumors according to HER2 status**

| HR-POSITIVE     |         |      |         |      |                       |      |         |       |        |
|-----------------|---------|------|---------|------|-----------------------|------|---------|-------|--------|
| PAM50 subtypes  | HER2 0+ |      | HER2 1+ |      | HER2 2+ NOT AMPLIFIED |      | Overall |       | p*     |
|                 | N       | %    | N       | %    | N                     | %    | N       | %     |        |
| Luminal A       | 187     | 51.8 | 283     | 57.9 | 174                   | 60.6 | 644     | 56.6  | <0.001 |
| Luminal B       | 126     | 34.9 | 162     | 33.1 | 97                    | 33.8 | 385     | 33.9  |        |
| HER2-enriched   | 12      | 3.3  | 16      | 3.3  | 7                     | 2.4  | 35      | 3.1   |        |
| Basal-like      | 29      | 8.0  | 12      | 2.5  | 3                     | 1.0  | 44      | 3.9   |        |
| Normal-like     | 7       | 1.9  | 16      | 3.3  | 6                     | 2.1  | 29      | 2.6   |        |
| Total           | 361     | 31.8 | 489     | 43.0 | 287                   | 25.2 | 1137    | 100.0 |        |
| TRIPLE NEGATIVE |         |      |         |      |                       |      |         |       |        |
| PAM50 subtypes  | HER2 0+ |      | HER2 1+ |      | HER2 2+ NOT AMPLIFIED |      | Overall |       | p*     |
|                 | N       | %    | N       | %    | N                     | %    | N       | %     |        |
| Luminal A       | 5       | 1.6  | 0       | 0.0  | 2                     | 5.4  | 7       | 1.6   | 0.284  |
| Luminal B       | 1       | 0.3  | 0       | 0.0  | 0                     | 0.0  | 1       | 0.2   |        |
| HER2-enriched   | 28      | 9.0  | 7       | 7.9  | 2                     | 5.4  | 37      | 8.5   |        |
| Basal-like      | 265     | 85.2 | 76      | 85.4 | 29                    | 78.4 | 370     | 84.7  |        |
| Normal-like     | 12      | 3.9  | 6       | 6.7  | 4                     | 10.8 | 22      | 5.0   |        |
| Total           | 311     | 71.2 | 89      | 20.4 | 37                    | 8.5  | 437     | 100.0 |        |

**Legend and footnotes.** \*: Chi square test

1 **Supplementary Table 4. Comparisons of PAM50 intrinsic subtypes distributions within each**  
 2 **HER2 IHC score according to HR status**

3

| PAM50 subtypes in<br>HER2 0                | HR-POSITIVE           |      | TNBC                  |      | OVERALL               |       | p*               |
|--------------------------------------------|-----------------------|------|-----------------------|------|-----------------------|-------|------------------|
|                                            | HER2 0+               |      | HER2 0+               |      | HER2 0+               |       |                  |
|                                            | N                     | %    | N                     | %    | N                     | %     |                  |
| Luminal A                                  | 187                   | 51.8 | 5                     | 1.6  | 192                   | 28.7  | <b>&lt;0.001</b> |
| Luminal B                                  | 126                   | 34.9 | 1                     | 0.3  | 127                   | 18.9  |                  |
| HER2-enriched                              | 12                    | 3.3  | 28                    | 9.0  | 40                    | 5.9   |                  |
| Basal-like                                 | 29                    | 8.0  | 265                   | 85.2 | 294                   | 43.7  |                  |
| Normal-like                                | 7                     | 1.9  | 12                    | 3.9  | 19                    | 2.8   |                  |
| Total                                      | 361                   | 53.7 | 311                   | 46.3 | 672                   | 100.0 |                  |
| PAM50 subtypes in<br>HER2 1+               | HER2 1+               |      | HER2 1+               |      | HER2 1+               |       |                  |
|                                            | N                     | %    | N                     | %    | N                     | %     |                  |
|                                            | Luminal A             | 283  | 57.9                  | 0    | 0.0                   | 283   |                  |
| Luminal B                                  | 162                   | 33.1 | 0                     | 0.0  | 162                   | 28.0  |                  |
| HER2-enriched                              | 16                    | 3.3  | 7                     | 7.9  | 23                    | 4.0   |                  |
| Basal-like                                 | 12                    | 2.5  | 76                    | 85.4 | 88                    | 15.2  |                  |
| Normal-like                                | 16                    | 3.3  | 6                     | 6.7  | 22                    | 3.8   |                  |
| Total                                      | 489                   | 84.6 | 89                    | 15.4 | 578                   | 100.0 |                  |
| PAM50 subtypes in<br>HER2 2+ Not Amplified | HER2 2+ Not Amplified |      | HER2 2+ Not Amplified |      | HER2 2+ Not Amplified |       |                  |
|                                            | N                     | %    | N                     | %    | N                     | %     |                  |
|                                            | Luminal A             | 174  | 60.6                  | 2    | 5.4                   | 176   |                  |
| Luminal B                                  | 97                    | 33.8 | 0                     | 0.0  | 97                    | 30.2  |                  |
| HER2-enriched                              | 7                     | 2.4  | 2                     | 5.4  | 9                     | 2.8   |                  |
| Basal-like                                 | 3                     | 1.0  | 29                    | 78.4 | 32                    | 9.8   |                  |
| Normal-like                                | 6                     | 2.1  | 4                     | 10.8 | 10                    | 3.0   |                  |
| Total                                      | 287                   | 88.6 | 37                    | 11.4 | 324                   | 100.0 |                  |

4  
5  
6  
7  
8  
9  
10  
11  
12  
13  
14  
15  
16  
17  
18  
19  
20  
21  
22

**Legend and footnotes. HR:** hormone receptors; **TNBC:** triple negative breast cancer; \*: Chi square test

23 **Supplementary table 5. List of genes and subtypes signatures evaluated for differential**  
 24 **expression analysis in the overall HER2-negative population and according to HR status**

25

| GENE/SIGNATURE       | OVERALL   | HR-POSITIVE   | TNBC      |
|----------------------|-----------|---------------|-----------|
| Basal-like           | Evaluable | Evaluable     | Evaluable |
| HER2-enriched        | Evaluable | Evaluable     | Evaluable |
| Luminal A            | Evaluable | Evaluable     | Evaluable |
| Luminal B            | Evaluable | Evaluable     | Evaluable |
| Normal-like          | Evaluable | Evaluable     | Evaluable |
| <i>ACTR3B</i>        | Evaluable | Evaluable     | Evaluable |
| <i>ANLN</i>          | Evaluable | Evaluable     | Evaluable |
| <i>AR</i>            | Evaluable | Not evaluable | Evaluable |
| <i>BAG1</i>          | Evaluable | Evaluable     | Evaluable |
| <i>BCL2</i>          | Evaluable | Evaluable     | Evaluable |
| <i>BIRC5</i>         | Evaluable | Evaluable     | Evaluable |
| <i>BLVRA</i>         | Evaluable | Evaluable     | Evaluable |
| <i>CCNB1</i>         | Evaluable | Evaluable     | Evaluable |
| <i>CCNE1</i>         | Evaluable | Evaluable     | Evaluable |
| <i>CD274</i> (PD-L1) | Evaluable | Not evaluable | Evaluable |
| <i>CD4</i>           | Evaluable | Not evaluable | Evaluable |
| <i>CD8A</i>          | Evaluable | Not evaluable | Evaluable |
| <i>CDC20</i>         | Evaluable | Evaluable     | Evaluable |
| <i>CDC6</i>          | Evaluable | Evaluable     | Evaluable |
| <i>CDCA1</i>         | Evaluable | Evaluable     | Evaluable |
| <i>CDH3</i>          | Evaluable | Evaluable     | Evaluable |
| <i>CENPF</i>         | Evaluable | Evaluable     | Evaluable |
| <i>CEP55</i>         | Evaluable | Evaluable     | Evaluable |
| <i>CXXC5</i>         | Evaluable | Evaluable     | Evaluable |
| <i>EGFR</i>          | Evaluable | Evaluable     | Evaluable |
| <i>ERBB2</i>         | Evaluable | Evaluable     | Evaluable |
| <i>ESR1</i>          | Evaluable | Evaluable     | Evaluable |
| <i>EXO1</i>          | Evaluable | Evaluable     | Evaluable |
| <i>FGFR4</i>         | Evaluable | Evaluable     | Evaluable |
| <i>FOXA1</i>         | Evaluable | Evaluable     | Evaluable |
| <i>FOXC1</i>         | Evaluable | Evaluable     | Evaluable |
| <i>GPR160</i>        | Evaluable | Evaluable     | Evaluable |
| <i>GRB7</i>          | Evaluable | Evaluable     | Evaluable |
| <i>KIF2C</i>         | Evaluable | Evaluable     | Evaluable |
| <i>KNTC2</i>         | Evaluable | Evaluable     | Evaluable |
| <i>KRT14</i>         | Evaluable | Evaluable     | Evaluable |
| <i>KRT17</i>         | Evaluable | Evaluable     | Evaluable |
| <i>KRT5</i>          | Evaluable | Evaluable     | Evaluable |
| <i>MAPT</i>          | Evaluable | Evaluable     | Evaluable |



|                    |           |               |           |
|--------------------|-----------|---------------|-----------|
| <i>MDM2</i>        | Evaluable | Evaluable     | Evaluable |
| <i>MELK</i>        | Evaluable | Evaluable     | Evaluable |
| <i>MIA</i>         | Evaluable | Evaluable     | Evaluable |
| <i>MKI67</i>       | Evaluable | Evaluable     | Evaluable |
| <i>MLPH</i>        | Evaluable | Evaluable     | Evaluable |
| <i>MMP11</i>       | Evaluable | Evaluable     | Evaluable |
| <i>MYBL2</i>       | Evaluable | Evaluable     | Evaluable |
| <i>MYC</i>         | Evaluable | Evaluable     | Evaluable |
| <i>NAT1</i>        | Evaluable | Evaluable     | Evaluable |
| <i>ORC6L</i>       | Evaluable | Evaluable     | Evaluable |
| <i>PDCD1 (PD1)</i> | Evaluable | Not evaluable | Evaluable |
| <i>PGR</i>         | Evaluable | Evaluable     | Evaluable |
| <i>PHGDH</i>       | Evaluable | Evaluable     | Evaluable |
| <i>PTTG1</i>       | Evaluable | Evaluable     | Evaluable |
| <i>RRM2</i>        | Evaluable | Evaluable     | Evaluable |
| <i>SFRP1</i>       | Evaluable | Evaluable     | Evaluable |
| <i>SLC39A6</i>     | Evaluable | Evaluable     | Evaluable |
| <i>TMEM45B</i>     | Evaluable | Evaluable     | Evaluable |
| <i>TYMS</i>        | Evaluable | Evaluable     | Evaluable |
| <i>UBE2C</i>       | Evaluable | Evaluable     | Evaluable |
| <i>UBE2T</i>       | Evaluable | Evaluable     | Evaluable |

26  
27  
28  
29  
30  
31  
32  
33  
34  
35  
36  
37  
38  
39

**Legend and footnotes. HR:** hormone receptors; **TNBC:** triple negative breast cancer

40 **Supplementary table 6. All differentially expressed genes of HER2-low vs. HER2 0 tumors in**  
41 **the overall, HR-positive and Triple Negative populations**

| GENE ID/SIGNATURE    | OVERALL  |            | HR-POSITIVE |            | TNBC     |       |
|----------------------|----------|------------|-------------|------------|----------|-------|
|                      | Score(d) | FDR*       | Score(d)    | FDR*       | Score(d) | FDR*  |
| Basal-like           | -5.67277 | <b>0.0</b> | -0.00299    | 24.7       | -0.82130 | 64.3  |
| HER2-enriched        | -0.39253 | <b>0.0</b> | 1.18400     | <b>3.2</b> | -1.30300 | 64.3  |
| Luminal A            | 4.73173  | <b>0.0</b> | 3.38402     | <b>0.0</b> | 0.14695  | 100.0 |
| Luminal B            | 2.06840  | <b>0.0</b> | 2.34168     | <b>0.0</b> | -1.22811 | 64.3  |
| Normal-like          | -0.33430 | <b>0.0</b> | 1.14341     | <b>3.2</b> | -0.07865 | 68.3  |
| <i>ACTR3B</i>        | 0.72473  | <b>1.8</b> | 0.74613     | 8.6        | -0.49266 | 64.3  |
| <i>ANLN</i>          | -7.39622 | <b>0.0</b> | -2.27444    | <b>0.0</b> | -0.35919 | 64.3  |
| <i>AR</i>            | 10.64278 | <b>0.0</b> | -           | -          | 0.39058  | 100.0 |
| <i>BAG1</i>          | -1.38371 | <b>0.0</b> | 0.90829     | 6.0        | -0.69894 | 64.3  |
| <i>BCL2</i>          | 8.20430  | <b>0.0</b> | 2.51291     | <b>0.0</b> | -0.01781 | 68.3  |
| <i>BIRC5</i>         | -5.55863 | <b>0.0</b> | -1.40851    | <b>0.9</b> | -0.27225 | 68.3  |
| <i>BLVRA</i>         | 5.14298  | <b>0.0</b> | 1.73118     | <b>0.0</b> | 0.20039  | 100.0 |
| <i>CCNB1</i>         | -3.76904 | <b>0.0</b> | -1.84185    | <b>0.0</b> | 0.02360  | 100.0 |
| <i>CCNE1</i>         | -9.55346 | <b>0.0</b> | -3.03781    | <b>0.0</b> | -0.86694 | 64.3  |
| <i>CD274</i> (PD-L1) | 2.00646  | <b>0.0</b> | -           | -          | -0.42082 | 64.3  |
| <i>CD4</i>           | 2.21548  | <b>0.0</b> | -           | -          | 0.28399  | 100.0 |
| <i>CD8A</i>          | -4.51166 | <b>0.0</b> | -           | -          | -0.85870 | 64.3  |
| <i>CDC20</i>         | -4.47577 | <b>0.0</b> | -0.87565    | 7.4        | -1.06613 | 64.3  |
| <i>CDC6</i>          | -3.37515 | <b>0.0</b> | -0.28853    | 21.8       | -0.24001 | 68.3  |
| <i>CDCA1</i>         | -4.18599 | <b>0.0</b> | -1.11544    | 6.0        | -0.81522 | 64.3  |
| <i>CDH3</i>          | -5.87928 | <b>0.0</b> | -1.06410    | 6.0        | -0.66177 | 64.3  |
| <i>CENPF</i>         | -6.99532 | <b>0.0</b> | -1.83252    | <b>0.0</b> | -0.95846 | 64.3  |
| <i>CEP55</i>         | -7.83024 | <b>0.0</b> | -1.28199    | <b>3.2</b> | -1.14879 | 64.3  |
| <i>CXXC5</i>         | -3.61475 | <b>0.0</b> | 0.24982     | 21.8       | -0.69201 | 64.3  |
| <i>EGFR</i>          | -0.82066 | <b>0.0</b> | 0.28270     | 21.8       | 0.60389  | 100.0 |
| <i>ERBB2</i>         | 9.97921  | <b>0.0</b> | 5.17067     | <b>0.0</b> | 1.66991  | 100.0 |
| <i>ESR1</i>          | 14.29386 | <b>0.0</b> | 4.96165     | <b>0.0</b> | 1.03532  | 100.0 |
| <i>EXO1</i>          | -7.12534 | <b>0.0</b> | -2.43602    | <b>0.0</b> | -1.17480 | 64.3  |
| <i>FGFR4</i>         | -1.39985 | <b>0.0</b> | -0.07579    | 24.7       | -0.12578 | 68.3  |
| <i>FOXA1</i>         | 13.26991 | <b>0.0</b> | 4.92557     | <b>0.0</b> | 0.97629  | 100.0 |
| <i>FOXC1</i>         | -8.43702 | <b>0.0</b> | -0.73815    | 9.7        | 0.20243  | 100.0 |
| <i>GPR160</i>        | 7.74052  | <b>0.0</b> | 2.78485     | <b>0.0</b> | -0.16216 | 68.3  |
| <i>GRB7</i>          | 6.09456  | <b>0.0</b> | 2.76279     | <b>0.0</b> | 0.92797  | 100.0 |
| <i>KIF2C</i>         | -3.12355 | <b>0.0</b> | -1.39427    | <b>0.9</b> | -0.01905 | 68.3  |
| <i>KNTC2</i>         | -7.77839 | <b>0.0</b> | -2.31629    | <b>0.0</b> | -0.72532 | 64.3  |
| <i>KRT14</i>         | -1.86137 | <b>0.0</b> | 0.61877     | 11.4       | 0.42407  | 100.0 |
| <i>KRT17</i>         | -5.64524 | <b>0.0</b> | 0.04017     | 27.5       | 0.19936  | 100.0 |
| <i>KRT5</i>          | -2.51720 | <b>0.0</b> | 0.84223     | 7.4        | 0.79709  | 100.0 |
| <i>MAPT</i>          | 9.94512  | <b>0.0</b> | 2.93645     | <b>0.0</b> | -0.21882 | 68.3  |
| <i>MDM2</i>          | 0.06691  | 5.3        | 1.12099     | <b>3.2</b> | -0.21097 | 68.3  |
| <i>MELK</i>          | -6.64057 | <b>0.0</b> | -1.49359    | <b>0.9</b> | -0.59390 | 64.3  |
| <i>MIA</i>           | -5.35993 | <b>0.0</b> | -0.95634    | 7.4        | 0.51230  | 100.0 |
| <i>MKI67</i>         | -8.67347 | <b>0.0</b> | -2.35485    | <b>0.0</b> | -0.96228 | 64.3  |
| <i>MLPH</i>          | 8.78099  | <b>0.0</b> | 2.63999     | <b>0.0</b> | -0.00518 | 68.3  |
| <i>MMP11</i>         | 6.58603  | <b>0.0</b> | 2.60115     | <b>0.0</b> | 0.77140  | 100.0 |
| <i>MYBL2</i>         | -3.97998 | <b>0.0</b> | -1.44618    | <b>0.9</b> | -0.90301 | 64.3  |
| <i>MYC</i>           | -5.90597 | <b>0.0</b> | -0.88871    | 7.4        | -0.01975 | 68.3  |
| <i>NAT1</i>          | 12.27258 | <b>0.0</b> | 4.10788     | <b>0.0</b> | -0.28319 | 68.3  |
| <i>ORC6L</i>         | -7.61981 | <b>0.0</b> | -2.32482    | <b>0.0</b> | -0.75740 | 64.3  |
| <i>PDCD1</i> (PD1)   | 0.26237  | 5.3        | -           | -          | -0.32005 | 68.3  |
| <i>PGR</i>           | 11.22998 | <b>0.0</b> | 3.17887     | <b>0.0</b> | 0.52015  | 100.0 |
| <i>PHGDH</i>         | -8.41385 | <b>0.0</b> | -1.68128    | <b>0.0</b> | -1.23951 | 64.3  |
| <i>PTTG1</i>         | -4.82226 | <b>0.0</b> | -1.44424    | <b>0.9</b> | -0.60645 | 64.3  |
| <i>RRM2</i>          | -5.93472 | <b>0.0</b> | -1.25960    | <b>3.2</b> | -0.41814 | 64.3  |
| <i>SFRP1</i>         | -4.83858 | <b>0.0</b> | -0.33182    | 16.4       | 1.23175  | 100.0 |

|                |          |     |          |      |          |       |
|----------------|----------|-----|----------|------|----------|-------|
| <i>SLC39A6</i> | 11.60247 | 0.0 | 3.96208  | 0.0  | -0.38795 | 64.3  |
| <i>TMEM45B</i> | 7.09375  | 0.0 | 2.02627  | 0.0  | 0.52291  | 100.0 |
| <i>TYMS</i>    | -3.20623 | 0.0 | -0.56947 | 13.6 | -0.49666 | 64.3  |
| <i>UBE2C</i>   | 2.37535  | 0.0 | -0.37100 | 16.4 | -0.69730 | 64.3  |
| <i>UBE2T</i>   | 4.54516  | 0.0 | 1.69281  | 0.0  | -0.55916 | 64.3  |

42

43 **Legend and footnotes.** HR: hormone receptors; TNBC: triple negative breast cancer; FDR: false discovery rate; \*:  
44 significant if FDR<5.0; Score(d): a T-statistic value that reflects a standardized change in expression and measures the  
45 strength of the relationship between gene expression and the HER2-low category (versus HER2 0)

**Supplementary table 7. Differentially expressed genes among HR-positive/HER2 0, HR-positive/HER2-low, TNBC/HER2 0 and TNBC/HER2-Low**

| <b>GENE ID</b> | <b>HR+/HER2 0<br/>Contrast</b> | <b>HR+/HER2-low<br/>Contrast</b> | <b>TNBC/HER2 0<br/>Contrast</b> | <b>TNBC/HER2-low<br/>Contrast</b> | <b>FDR*</b> |
|----------------|--------------------------------|----------------------------------|---------------------------------|-----------------------------------|-------------|
| <i>ESR1</i>    | 6.861742068                    | 11.1074889                       | -12.90998321                    | -12.08492615                      | <b>0</b>    |
| <i>FOXA1</i>   | 5.778217896                    | 8.825351095                      | -10.4809953                     | -9.413459819                      | <b>0</b>    |
| <i>NAT1</i>    | 4.318943613                    | 8.027254553                      | -8.897426094                    | -9.080491687                      | <b>0</b>    |
| <i>SLC39A6</i> | 3.964146625                    | 7.87369166                       | -8.600693487                    | -8.83063485                       | <b>0</b>    |
| <i>PGR</i>     | 3.688389562                    | 6.507937351                      | -7.385485991                    | -7.0821826                        | <b>0</b>    |
| <i>AR</i>      | 3.652669581                    | 6.241609361                      | -7.154953824                    | -6.753890554                      | <b>0</b>    |
| <i>MAPT</i>    | 3.542191338                    | 5.97143271                       | -6.749174571                    | -6.935422423                      | <b>0</b>    |
| <i>FOXC1</i>   | -4.981864542                   | -5.538845927                     | 6.9775032                       | 7.185258765                       | <b>0</b>    |
| <i>CCNE1</i>   | -3.37762021                    | -6.018579053                     | 6.943340875                     | 6.038719686                       | <b>0</b>    |
| <i>MLPH</i>    | 2.581366165                    | 4.571432528                      | -5.139368572                    | -5.143849516                      | <b>0</b>    |
| <i>PHGDH</i>   | -3.455515264                   | -4.906927001                     | 6.05145693                      | 4.868929478                       | <b>0</b>    |
| <i>MKI67</i>   | -2.985374693                   | -5.147177429                     | 5.996903821                     | 5.137457962                       | <b>0</b>    |
| <i>BCL2</i>    | 3.004496715                    | 5.226004989                      | -5.895454984                    | -5.913599185                      | <b>0</b>    |
| <i>CEP55</i>   | -3.612167568                   | -4.800907334                     | 6.001214003                     | 4.933726234                       | <b>0</b>    |
| <i>GPR160</i>  | 2.295959541                    | 4.559067178                      | -4.97306946                     | -5.141532706                      | <b>0</b>    |
| <i>ERBB2</i>   | 0.853469611                    | 5.811851031                      | -5.865658229                    | -4.065682234                      | <b>0</b>    |
| <i>KRT17</i>   | -3.053703742                   | -3.024321445                     | 3.939545973                     | 4.115344828                       | <b>0</b>    |
| <i>KNTC2</i>   | -2.521227666                   | -4.615649371                     | 5.312815869                     | 4.533560183                       | <b>0</b>    |
| <i>ANLN</i>    | -2.394303094                   | -4.430910963                     | 5.010002631                     | 4.649030645                       | <b>0</b>    |
| <i>ORC6L</i>   | -2.315621728                   | -4.553831424                     | 5.153881435                     | 4.455539376                       | <b>0</b>    |
| <i>TMEM45B</i> | 2.195984431                    | 3.7004643                        | -4.316099686                    | -3.778937655                      | <b>0</b>    |
| <i>CENPF</i>   | -2.356851503                   | -3.977967627                     | 4.718493603                     | 3.747639361                       | <b>0</b>    |
| <i>SFRP1</i>   | -2.673552292                   | -2.925551032                     | 3.491589308                     | 4.638618441                       | <b>0</b>    |
| <i>MELK</i>    | -2.567267617                   | -3.980373357                     | 4.725372162                     | 4.171204745                       | <b>0</b>    |
| <i>MYC</i>     | -2.623452681                   | -3.435772806                     | 4.15842533                      | 4.142345807                       | <b>0</b>    |
| <i>MIA</i>     | -2.348514667                   | -2.976385496                     | 3.519190449                     | 4.071299962                       | <b>0</b>    |
| <i>EXO1</i>    | -1.689980966                   | -3.92999769                      | 4.430571237                     | 3.267594746                       | <b>0</b>    |
| <i>CDH3</i>    | -2.183753512                   | -3.074722651                     | 3.770177997                     | 3.174202065                       | <b>0</b>    |
| <i>RRM2</i>    | -2.207292008                   | -3.398663576                     | 4.016121429                     | 3.666137082                       | <b>0</b>    |
| <i>MMP11</i>   | 1.018291318                    | 3.028611945                      | -3.254201613                    | -2.548210338                      | <b>0</b>    |

|                      |              |              |              |              |            |
|----------------------|--------------|--------------|--------------|--------------|------------|
| <i>BIRC5</i>         | -1.847675311 | -3.098541079 | 3.577831485  | 3.323902063  | <b>0</b>   |
| <i>GRB7</i>          | 0.736362322  | 3.304204501  | -3.433618431 | -2.451544203 | <b>0</b>   |
| <i>CXXC5</i>         | -1.912486573 | -1.700216734 | 2.397390797  | 2.01123729   | <b>0</b>   |
| <i>BLVRA</i>         | 1.572120525  | 3.282508268  | -3.616414509 | -3.393016952 | <b>0</b>   |
| <i>KRT5</i>          | -2.145753017 | -1.520262446 | 2.119765859  | 2.802387954  | <b>0</b>   |
| <i>UBE2T</i>         | 1.104568388  | 2.625459449  | -2.684460847 | -3.204873418 | <b>0</b>   |
| <i>PTTG1</i>         | -1.357405686 | -2.746825946 | 3.129379599  | 2.524954233  | <b>0</b>   |
| <i>CDC20</i>         | -1.561003057 | -2.341316049 | 2.956453401  | 1.870697613  | <b>0</b>   |
| <i>CD8A</i>          | -1.06424082  | -2.222143957 | 2.587451424  | 1.75430237   | <b>0</b>   |
| <i>CDCA1</i>         | -1.221013694 | -2.220418771 | 2.658470223  | 1.797942709  | <b>0</b>   |
| <i>CDC6</i>          | -1.826050077 | -2.119404114 | 2.698602991  | 2.469801753  | <b>0</b>   |
| <i>UBE2C</i>         | 1.935072987  | 1.613637076  | -2.113706106 | -2.78929955  | <b>0</b>   |
| <i>KRT14</i>         | -1.484755864 | -1.07590958  | 1.498947303  | 1.917394719  | <b>0</b>   |
| <i>MYBL2</i>         | -0.566292389 | -1.883199658 | 2.063921511  | 1.287040354  | <b>0</b>   |
| <i>TYMS</i>          | -1.245558217 | -1.757831987 | 2.189600191  | 1.675491781  | <b>0</b>   |
| <i>CCNB1</i>         | -0.414304024 | -2.224612346 | 2.136840048  | 2.161647332  | <b>0</b>   |
| <i>KIF2C</i>         | -0.435803157 | -1.716742224 | 1.706395887  | 1.687281857  | <b>0</b>   |
| <i>BAG1</i>          | -1.591018957 | -0.745488035 | 1.416825439  | 1.030570598  | <b>0</b>   |
| <i>CD4</i>           | 1.278682017  | 1.372164069  | -1.860963503 | -1.357264788 | <b>0</b>   |
| <i>CD274 (PD-L1)</i> | 0.750358454  | 1.166321248  | -1.32500004  | -1.450554218 | <b>0</b>   |
| <i>EGFR</i>          | -0.885894045 | -0.653610577 | 0.831535115  | 1.439230248  | <b>0</b>   |
| <i>FGFR4</i>         | -0.62915164  | -0.693176137 | 0.901706886  | 0.800116908  | <b>0</b>   |
| <i>MDM2</i>          | -1.186448168 | -0.079815829 | 0.607015399  | 0.460937749  | <b>0.1</b> |
| <i>ACTR3B</i>        | -0.247048402 | 0.516653373  | -0.24331634  | -0.769816605 | <b>1.8</b> |
| <i>PDCD1 (PD1)</i>   | 0.229962949  | 0.162491103  | -0.235653338 | -0.265422996 | <b>3.0</b> |

**Legend and footnotes.** FDR: false discovery rate; \*: significant if FDR<5.0; HR: hormone receptor; TNBC: triple negative breast cancer; *Contrast*: is the standardized mean difference between the gene's expression in a class vs. its overall mean expression in the overall dataset.

**Supplementary Table 8. Gene expression of HER2-2+ compared to HER2 1+ and 0 tumors in the HR-positive subset**

| GENE/SIGNATURE | HR-POSITIVE/HER2-NEGATIVE |                            |                               |            |
|----------------|---------------------------|----------------------------|-------------------------------|------------|
|                | HER2 0<br><i>Contrast</i> | HER2 1+<br><i>Contrast</i> | HER2 2+ NA<br><i>Contrast</i> | FDR*       |
| Basal-like     | 0.00283                   | -0.88603                   | 1.45201                       | <b>3.6</b> |
| HER2-enriched  | -1.16229                  | -0.44507                   | 2.21633                       | <b>0.0</b> |
| Luminal A      | -3.21810                  | 0.46473                    | 3.34852                       | <b>0.0</b> |
| Luminal B      | -2.25388                  | -0.16542                   | 3.15172                       | <b>0.0</b> |
| Normal-like    | -1.05603                  | -0.39148                   | 1.99252                       | <b>0.9</b> |
| <i>ACTR3B</i>  | -0.58029                  | 0.17146                    | 0.45979                       | 14.1       |
| <i>ANLN</i>    | 1.57948                   | -0.47296                   | -1.24122                      | <b>0.0</b> |
| <i>BAG1</i>    | -0.53348                  | -0.54786                   | 1.58172                       | <b>0.0</b> |
| <i>BCL2</i>    | -1.75095                  | 0.37398                    | 1.62293                       | <b>0.0</b> |
| <i>BIRC5</i>   | 0.93034                   | -0.64932                   | -0.12203                      | <b>3.6</b> |
| <i>BLVRA</i>   | -1.36454                  | 0.36271                    | 1.14771                       | <b>0.9</b> |
| <i>CCNB1</i>   | 1.38774                   | -0.34588                   | -1.20499                      | <b>0.0</b> |
| <i>CCNE1</i>   | 2.22623                   | -0.36631                   | -2.24283                      | <b>0.0</b> |
| <i>CDC20</i>   | 0.61235                   | -0.68690                   | 0.34603                       | 7.2        |
| <i>CDC6</i>    | 0.20957                   | -0.39872                   | 0.38725                       | 17.9       |
| <i>CDCA1</i>   | 0.79716                   | -0.32239                   | -0.48896                      | 7.6        |
| <i>CDH3</i>    | 0.66493                   | -0.06819                   | -0.73761                      | 7.2        |
| <i>CENPF</i>   | 1.26956                   | -0.66734                   | -0.52587                      | <b>0.9</b> |
| <i>CEP55</i>   | 0.87016                   | -0.94497                   | 0.44058                       | <b>2.3</b> |
| <i>CXC5</i>    | -0.13594                  | -0.42676                   | 0.87480                       | <b>3.6</b> |
| <i>EGFR</i>    | -0.18705                  | 0.13757                    | 0.01300                       | 23.1       |
| <i>ERBB2</i>   | -3.94793                  | 0.94579                    | 3.49078                       | <b>0.0</b> |
| <i>ESR1</i>    | -2.98901                  | 0.75918                    | 2.57206                       | <b>0.0</b> |
| <i>EXO1</i>    | 1.70203                   | -0.46725                   | -1.40718                      | <b>0.0</b> |
| <i>FGFR4</i>   | 0.04529                   | -0.26643                   | 0.37983                       | 17.9       |
| <i>FOXA1</i>   | -3.05763                  | 0.93147                    | 2.37671                       | <b>0.0</b> |
| <i>FOXC1</i>   | 0.47400                   | -0.61673                   | 0.40753                       | 7.2        |
| <i>GPR160</i>  | -1.88797                  | 0.16030                    | 2.14905                       | <b>0.0</b> |
| <i>GRB7</i>    | -2.03291                  | 0.49749                    | 1.78031                       | <b>0.0</b> |
| <i>KIF2C</i>   | 0.98070                   | -0.63800                   | -0.20498                      | <b>3.6</b> |
| <i>KNTC2</i>   | 1.61274                   | -0.99690                   | -0.42297                      | <b>0.0</b> |
| <i>KRT14</i>   | -0.35626                  | 0.27656                    | 0.00087                       | 17.9       |
| <i>KRT17</i>   | -0.02275                  | 0.23574                    | -0.35823                      | 17.9       |
| <i>KRT5</i>    | -0.47377                  | 0.25375                    | 0.18850                       | 14.1       |
| <i>MAPT</i>    | -1.77205                  | 0.44702                    | 1.52990                       | <b>0.0</b> |
| <i>MDM2</i>    | -0.71511                  | 0.04468                    | 0.84036                       | <b>3.6</b> |
| <i>MELK</i>    | 1.02701                   | -0.83862                   | 0.06545                       | <b>2.3</b> |
| <i>MIA</i>     | 0.59910                   | -0.58990                   | 0.20360                       | 7.2        |
| <i>MKI67</i>   | 1.55384                   | -0.95257                   | -0.42053                      | <b>0.0</b> |
| <i>MLPH</i>    | -1.51625                  | -0.02501                   | 1.97851                       | <b>0.0</b> |
| <i>MMP11</i>   | -1.55869                  | 0.86881                    | 0.56434                       | <b>0.0</b> |
| <i>MYBL2</i>   | 0.93321                   | -0.29141                   | -0.71369                      | <b>3.6</b> |
| <i>MYC</i>     | 0.56299                   | -0.63562                   | 0.32485                       | 7.2        |
| <i>NAT1</i>    | -2.40914                  | 0.90353                    | 1.59398                       | <b>0.0</b> |
| <i>ORC6L</i>   | 1.60517                   | -0.95927                   | -0.47510                      | <b>0.0</b> |
| <i>PGR</i>     | -1.79970                  | 0.93024                    | 0.77136                       | <b>0.0</b> |
| <i>PHGDH</i>   | 1.10544                   | -0.67271                   | -0.30734                      | <b>2.3</b> |
| <i>PTTG1</i>   | 1.04078                   | -0.94181                   | 0.21738                       | <b>2.3</b> |
| <i>RRM2</i>    | 0.82596                   | -0.84250                   | 0.32871                       | <b>2.3</b> |
| <i>SFRP1</i>   | 0.19926                   | 0.37772                    | -0.87516                      | 7.2        |
| <i>SLC39A6</i> | -2.47832                  | 0.13383                    | 2.94689                       | <b>0.0</b> |
| <i>TMEM45B</i> | -1.28927                  | 0.80674                    | 0.32204                       | <b>0.0</b> |
| <i>TYMS</i>    | 0.40551                   | -0.74150                   | 0.70003                       | 7.2        |
| <i>UBE2C</i>   | 0.24692                   | -0.39737                   | 0.33732                       | 14.1       |
| <i>UBE2T</i>   | -1.13151                  | -0.22770                   | 1.81989                       | <b>0.0</b> |

**Legend and footnotes.** **Neg:** negative; **ISH:** in-situ hybridization; **HR:** hormone receptors; **NA:** not amplified; **FDR:** false discovery rate; \*: significant if  $FDR < 5.0$ ; *Contrast:* is the standardized mean difference between the gene's expression in a class vs. its overall mean expression in the overall dataset.

**Supplementary table 9. Included studies' description**

| Study                                                                                  | Study Centers                                                                                                                                                | Setting             | Study type                       | N. of pts | Tumor types included | PAM50 type                                                                                                                                                                                                                                                                                               | Study reference                                                                                                                         |
|----------------------------------------------------------------------------------------|--------------------------------------------------------------------------------------------------------------------------------------------------------------|---------------------|----------------------------------|-----------|----------------------|----------------------------------------------------------------------------------------------------------------------------------------------------------------------------------------------------------------------------------------------------------------------------------------------------------|-----------------------------------------------------------------------------------------------------------------------------------------|
| Cooperational spanish-italian study (including patients from the GEICAM/2012-09 study) | 15 hospitals across Spain (centralized Prosigna assay and centralized pathology re-evaluation at the Gregorio Marañón Biomedical Research Institute, Madrid) | Early (Adjuvant)    | Observational prospective        | 194       | HR+/HER2-            | Commercialized and standardized PAM50/Prosigna assay (NanoString Technologies, Seattle, WA) on FFPE tissues                                                                                                                                                                                              | Martin M, et al. <i>Curr Med Res Opin.</i> 2015; 31:1129-1137 and Fernandez-Martinez, A. et al. <i>Oncotarget</i> 8, 21930–21937 (2017) |
|                                                                                        | Campus Bio-Medico University (Rome)                                                                                                                          | Early (Adjuvant)    | Observational prospective        | 159       | HR+/HER2-            |                                                                                                                                                                                                                                                                                                          | Fernandez-Martinez, A. et al. <i>Oncotarget</i> 8, 21930–21937 (2017) + unpublished                                                     |
|                                                                                        | Vall d'Hebron Institute of Oncology (Barcelona)                                                                                                              | Early (Adjuvant)    | Observational prospective        | 117       | HR+/HER2-            |                                                                                                                                                                                                                                                                                                          | Fernandez-Martinez, A. et al. <i>Oncotarget</i> 8, 21930–21937 (2017).                                                                  |
| c-Biportal                                                                             | A patient-driven initiative on the Metastatic Breast Cancer Project platform                                                                                 | Early & Metastatic  | Observational prospective        | 103       | HR+/HER2- and TNBC   | N/A                                                                                                                                                                                                                                                                                                      | The Metastatic Breast Cancer Project. <a href="https://www.mbcproject.org/">https://www.mbcproject.org/</a>                             |
|                                                                                        | Memorial Sloan Kettering Cancer Center                                                                                                                       | Early               | Observational retrospective      | 1637      | HR+/HER2- and TNBC   | N/A                                                                                                                                                                                                                                                                                                      | Razavi, P. et al. <i>Cancer Cell</i> 34, 427-438.e6 (2018).                                                                             |
|                                                                                        | TCGA                                                                                                                                                         | Early               | Observational retrospective      | 111       | HR+/HER2- and TNBC   | Intrinsic subtypes were defined by applying the PAM50 predictor fom Parker, J. S. et al. <i>J. Clin. Oncol.</i> 27, 1160–1167 (2009)                                                                                                                                                                     | Ciriello, G. et al. <i>Cell</i> 163, 506–519 (2015).                                                                                    |
|                                                                                        | TCGA                                                                                                                                                         | Early               | Observational retrospective      | 207       | HR+/HER2- and TNBC   | N/A                                                                                                                                                                                                                                                                                                      | Cancer Genome Atlas Network. <i>Nature</i> 490, 61–70 (2012).                                                                           |
| SOLTI 1501-VENTANA                                                                     | 9 hospitals in Spain (including the Hospital Clinic of Barcelona and the Vall d'Hebron Institute of Oncology)                                                | Early (Neoadjuvant) | Randomized window-of-opportunity | 46        | HR+/HER2-            | Breast 360TM Codeset for PAM50 assay (NanoString Technologies, Seattle, WA) on FFPE tissues. Intrinsic molecular subtypes were identified using the research-based PAM50 predictor described in Prat A, et al. <i>JAMA Oncol</i> 2016; 2: 1287–94 and Vidal M, et al. <i>Mol Oncol</i> 2015; 9: 1081–90. | Adamo, B. et al. <i>Breast Cancer Res.</i> 21, 108 (2019).                                                                              |



|                                                 |                                                                                                                   |                     |                                             |     |                    |                                                                                                                                                                                                                                                        |                                                      |
|-------------------------------------------------|-------------------------------------------------------------------------------------------------------------------|---------------------|---------------------------------------------|-----|--------------------|--------------------------------------------------------------------------------------------------------------------------------------------------------------------------------------------------------------------------------------------------------|------------------------------------------------------|
| SOLTI 1402-CORALEEN                             | 21 hospitals in Spain (only the Hospital Clinic of Barcelona cohort was used)                                     | Early (Neoadjuvant) | Randomized phase II                         | 14  | HR+/HER2-          | Commercialized and standardized PAM50/Prosigna assay (NanoString Technologies, Seattle, WA) on FFPE tissues                                                                                                                                            | Prat, A. et al. Lancet Oncol. 21, 33–43 (2020).      |
| CIBOMA/2004-01_GEICAM/2003-11 study             | 80 institutions from Spain, Brazil, Chile, Colombia, Ecuador, Mexico, Peru, and Venezuela (pathology centralized) | Early (Adjuvant)    | Randomized phase III                        | 375 | TNBC               |                                                                                                                                                                                                                                                        | Lluch, A. et al. J. Clin. Oncol. 38, 203–213 (2020). |
| Hospital Clinic of Barcelona internal databases | Hospital Clinic of Barcelona                                                                                      | Early & Metastatic  | Observational prospective and retrospective | 726 | HR+/HER2- and TNBC | Commercialized and standardized PAM50/Prosigna assay (NanoString Technologies, Seattle, WA) on FFPE tissues and research-based PAM50 predictor described in Prat A, et al. JAMA Oncol 2016; 2: 1287–94 and Vidal M, et al. Mol Oncol 2015; 9: 1081–90. | N/A                                                  |

**Legend and footnotes.** N/A: not applicable; HR+: hormone receptor positive; -: negative; TNBC: triple negative breast cancer; FFPE: formalin-fixed paraffin-embedded; pts: patients.

1 **Supplementary figures**

2

3 **Supplementary figure 1. Plot for 2 class unpaired SAM analysis in the overall population**

4

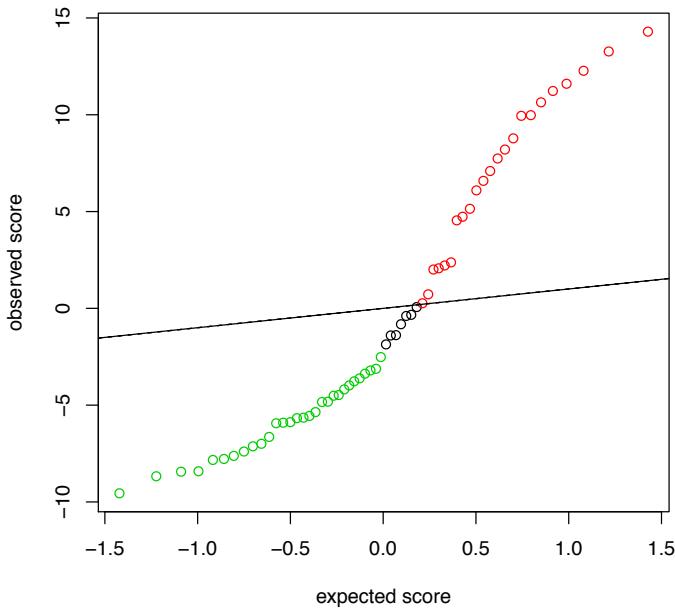

5

6 **Legend:** The red dots represent relative high gene expression, the green dots represent relative low gene expression, and  
7 black dots represent median gene expression for HER2-low vs. HER2 0 in the overall population.

8

9

10 **Supplementary figure 2. Plot for 2 class unpaired SAM analysis in the HR-positive population**

11

12

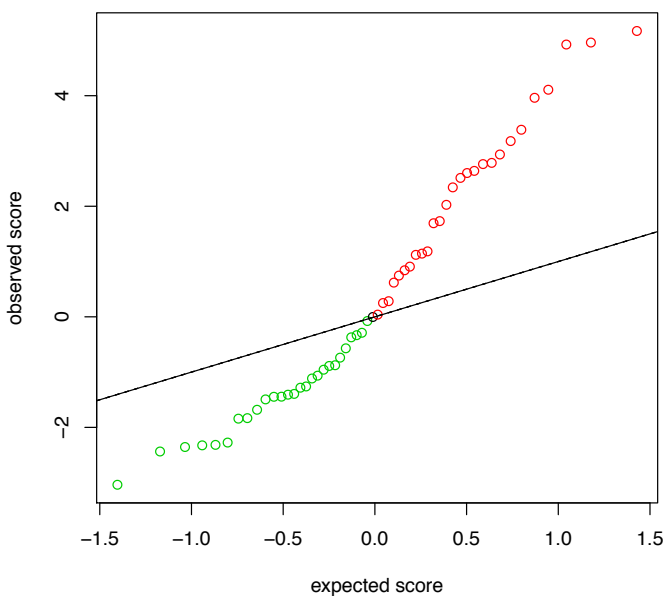

13

14  
15 **Legend:** The red dots represent relative high gene expression, the green dots represent relative low gene expression, and  
16 black dots represent median gene expression for HER2-low vs. HER2 0 in the HR-positive population.

17

18 **Supplementary figure 3. Plot for 2 class unpaired SAM analysis in the TN population**

19  
20

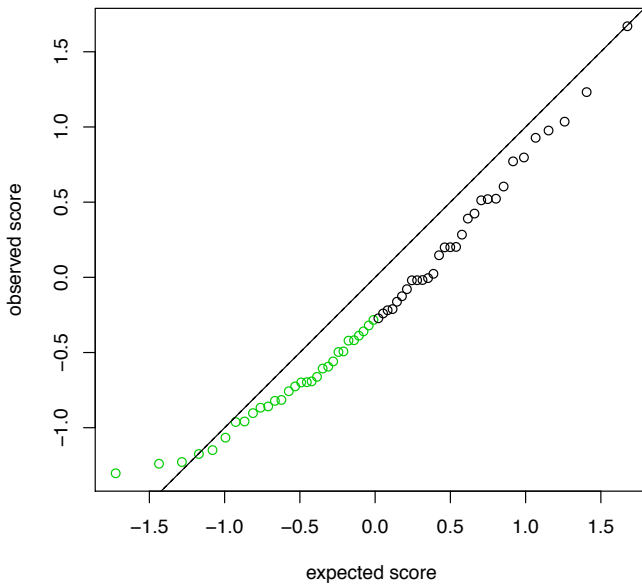

21  
22 **Legend:** The green dots represent relative low gene expression, and black dots represent median gene expression for  
23 HER2-low vs. HER2 0 in the TNBC population.

24

25

26

27

28

29

30

31

32

33

34

35 **Supplementary figure 4. Gene expression patterns of the HR-positive/HER2-negative breast**  
36 **cancers**

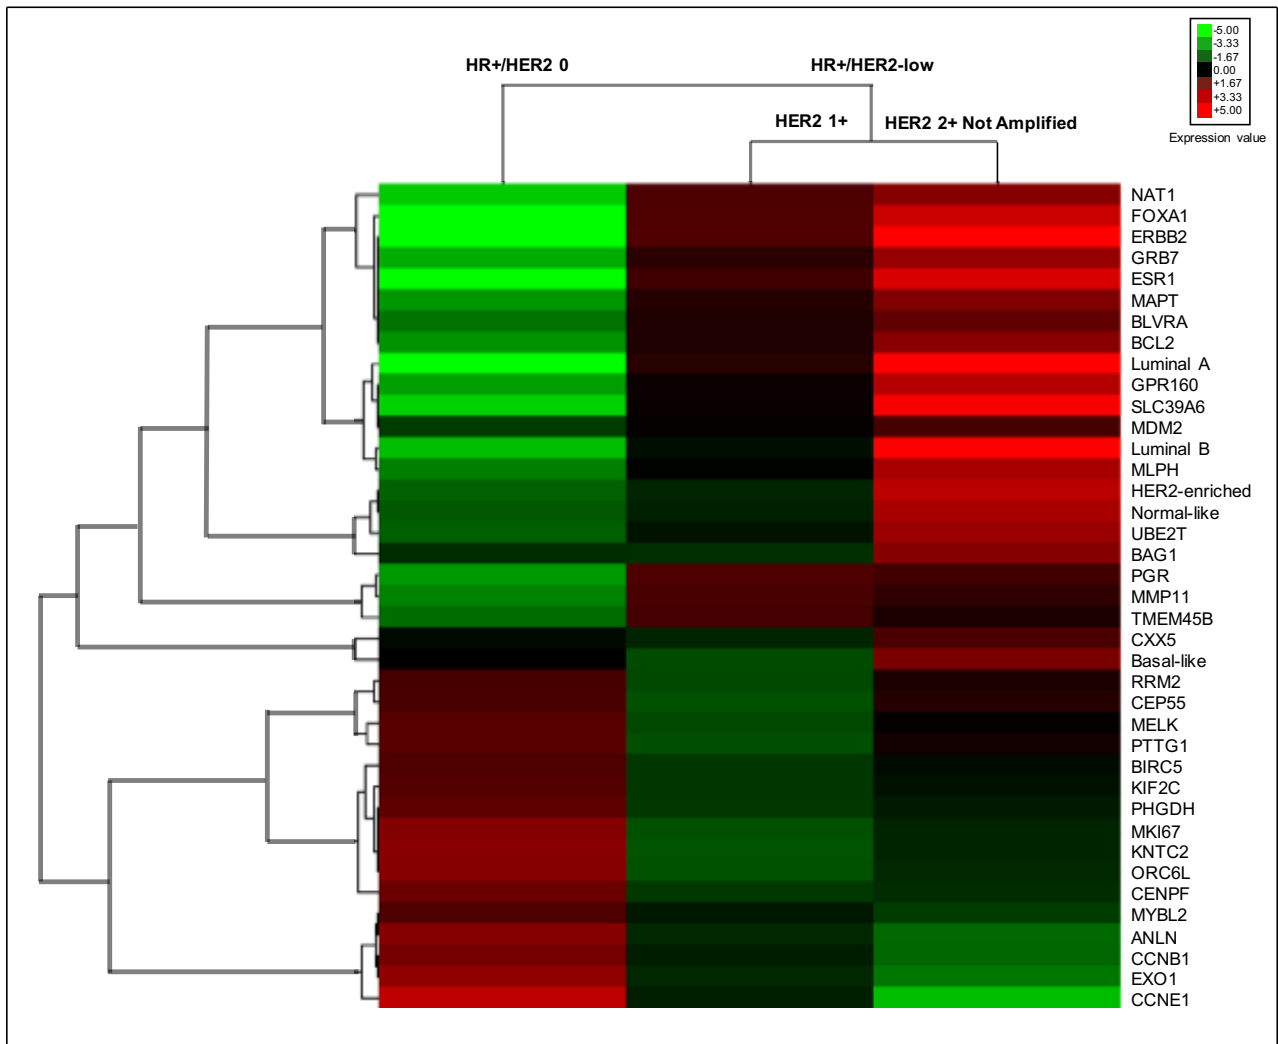

37

38

39 **Legend. A:** supervised cluster of the HR-positive/HER2-negative breast cancers (total of 3 classes according to HER2  
40 IHC score) with 55 variables. Sample and gene expression data from tumor samples of the same subtype have been  
41 combined into a single category. For each gene in a class, we calculated the standardized mean difference between the  
42 gene's expression in that class vs. its overall mean expression in the dataset using a 3-class Significance Analyses of  
43 Microarrays. The red color represents relative high gene expression, green represents relative low gene expression, and  
44 black represents median gene expression. **HR:** hormone receptors.

45

46

47

48 **Supplementary Data Set**

49

50 Anonymized database with already normalized patients' PAM50 gene expression data and their  
51 hormone receptor status, HER2 immunohistochemical score, HER2-low status and intrinsic subtype.

52
